# Supplementary material for: Lanthanide–3d cyanometalate chains Ln(iii)–M(iii) (Ln = Pr, Nd, Sm, Eu, Gd, Tb; M = Fe) with the tridentate ligand 2,4,6-tri(2-pyridyl)-1,3,5-triazine (tptz): evidence of ferromagnetic interactions for the Sm(iii)–M(iii) compounds (M = Fe, Cr)
Source: Royal Society of Chemistry journal article supplement (doi:10.1039/b616016f), 2007-01-01
Supplement: b616016f.pdf [file b616016f.pdf]

## **Supplementary Material**

### **Lanthanide-3d Cyanometalate Chains Ln(III)-M(III) (Ln = Pr, Nd, Sm, Eu, Gd, Tb; M = Fe) with the Tridentate Ligand 2,4,6-tri(2-pyridyl)-1,3,5-triazine (tptz): Evidence of Ferromagnetic Interactions for the Sm(III)-M(III) compounds (M = Fe, Cr)**

Hanhua Zhao, Nazario Lopez, Andrey Prosvirin, Helen T. Chifotides, and Kim R. Dunbar\*

Figures S1-S13.

Tables S1-S5.

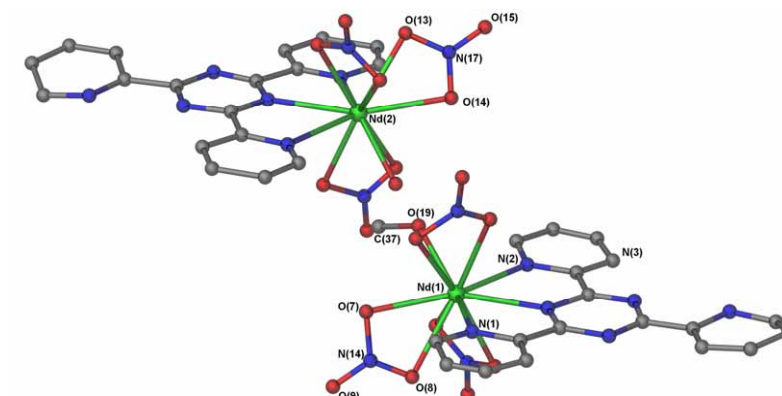

**Figure S1.** Structure of  $[\text{Nd}(\text{tptz})(\text{NO}_3)_3(\text{H}_2\text{O})][\text{Nd}(\text{tptz})(\text{NO}_3)_3(\text{CH}_3\text{OH})]$ .

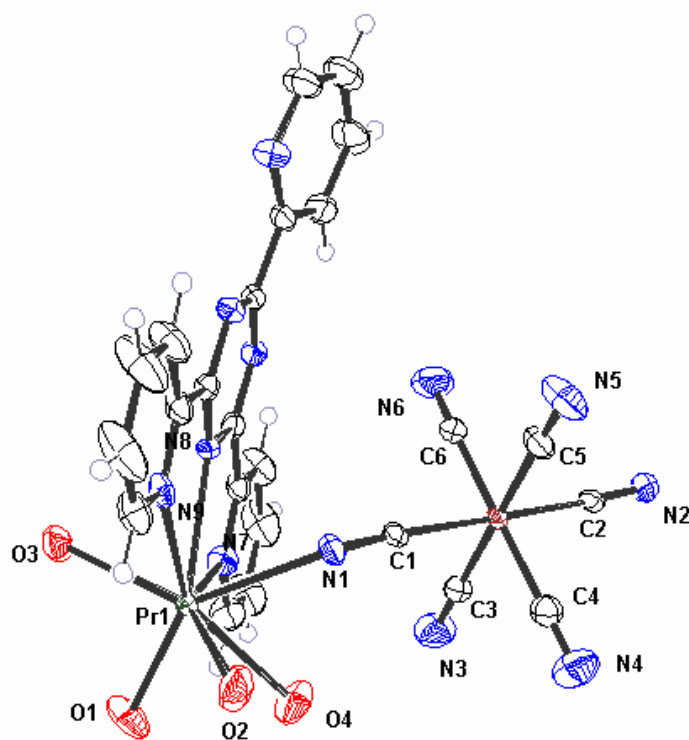

**Figure S2.** Thermal ellipsoid plot for  $\{[\text{Pr}(\text{tptz})(\text{H}_2\text{O})_4\text{Fe}(\text{CN})_6] \cdot 8\text{H}_2\text{O}\}_\infty$  (**1**) drawn at the 50% probability level; water crystallization molecules in the lattice have been omitted for the sake of clarity.

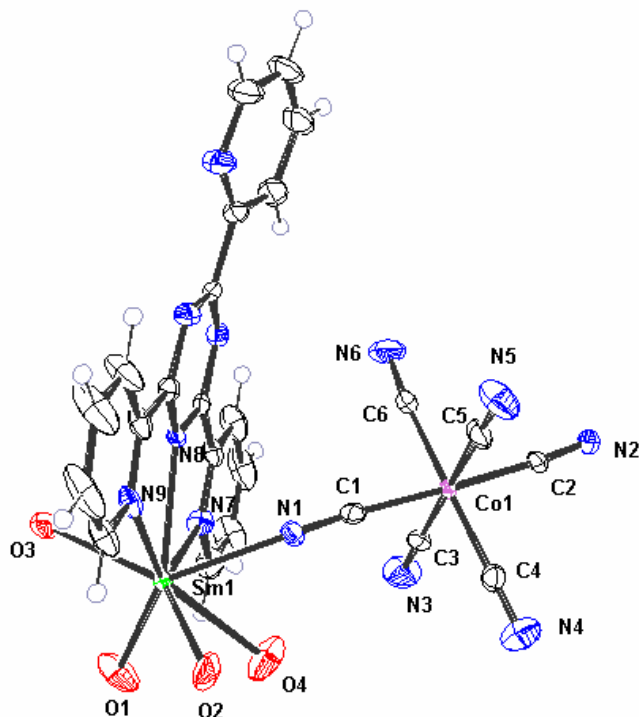

**Figure S3.** Thermal ellipsoid plot for  $\{[\text{Sm}(\text{tpz})(\text{H}_2\text{O})_4\text{Co}(\text{CN})_6]\cdot 8\text{H}_2\text{O}\}_\infty$  (**7**) drawn at the 50% probability level; water molecules of crystallization in the lattice have been omitted for the sake of clarity.

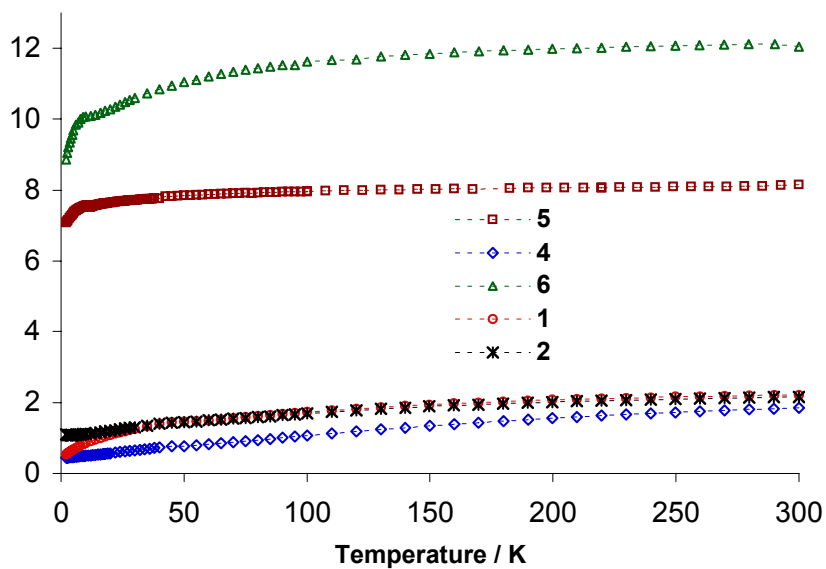

**Figure S4.** Temperature dependence of the  $\chi T$  product for compounds **1** (o), **2** (\*), **4** (◇), **5** (□), **6** (Δ).

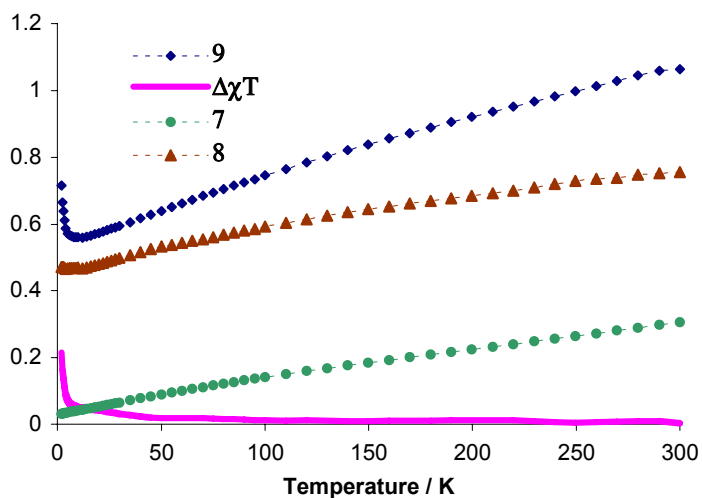

**Figure S5.** Temperature dependence of the  $\chi T$  product for compounds **9** ( $\diamond$ ), **7** ( $\circ$ ), **8** ( $\Delta$ ). The solid line represents the difference  $\Delta\chi T = \chi T$  (**9**) -  $\chi T$  (**7**) -  $\chi T$  (**8**).

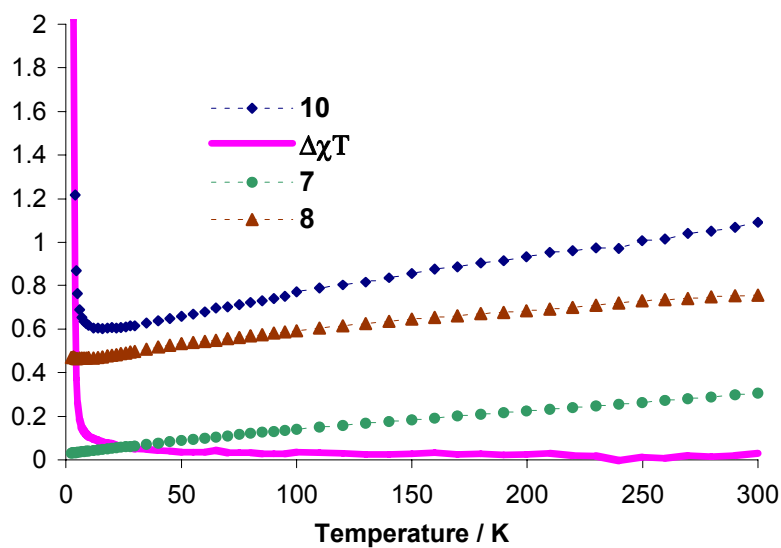

**Figure S6.** Temperature dependence of the  $\chi T$  product for compounds **10** ( $\diamond$ ), **7** ( $\circ$ ), **8** ( $\Delta$ ). The solid line represents the difference  $\Delta\chi T = \chi T$  (**10**) -  $\chi T$  (**7**) -  $\chi T$  (**8**).

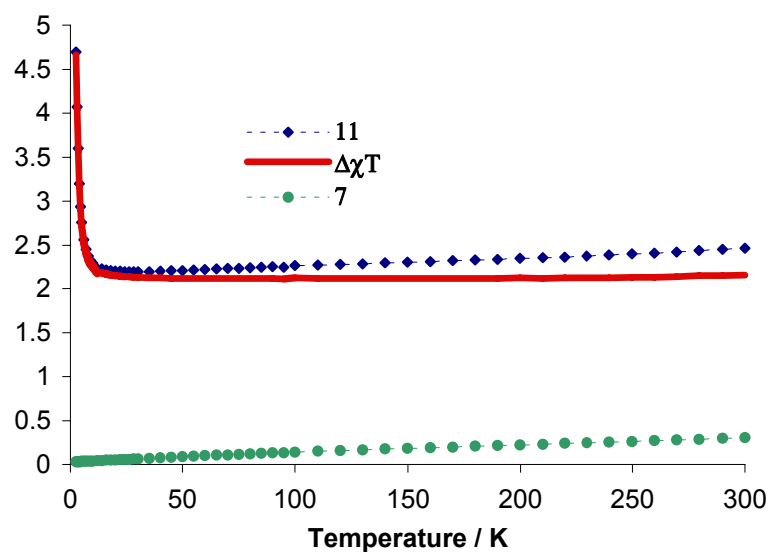

**Figure S7.** Temperature dependence of the  $\chi T$  product for compounds **11** ( $\diamond$ ), **7** ( $\circ$ ). The solid line represents the difference  $\Delta\chi T = \chi T$  (**11**) -  $\chi T$  (**7**).

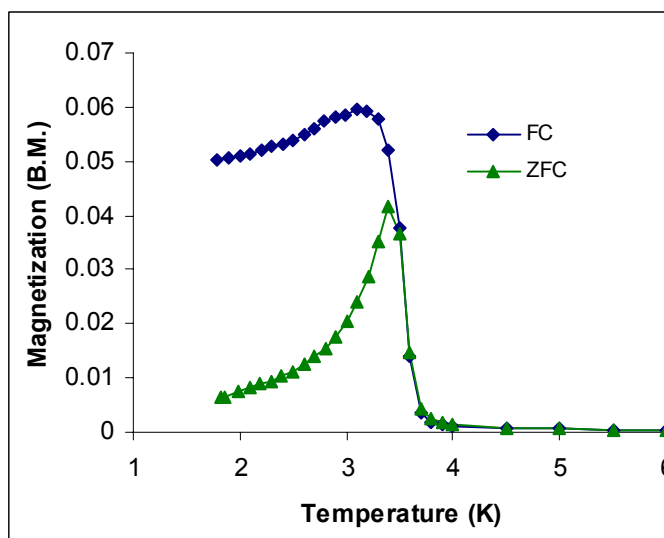

**Figure S8.** Temperature dependence of magnetization in the zero-field-cooling (ZFC) and field-cooling (FC) regime for **10** at magnetic field of 10 Oe.

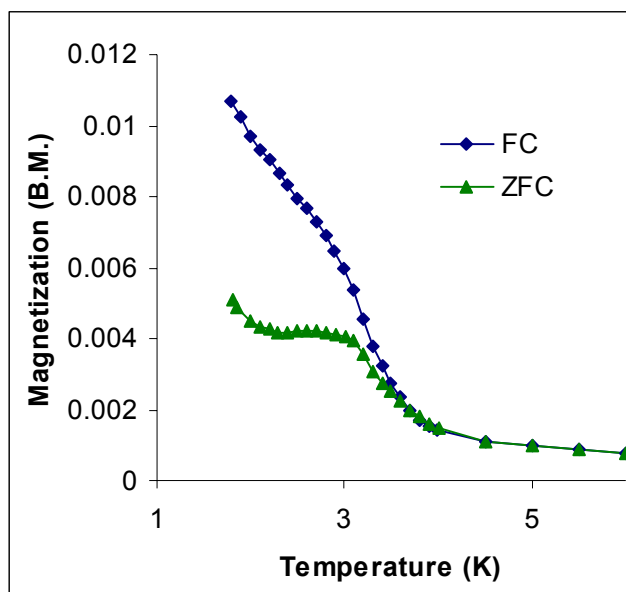

**Figure S9.** Temperature dependence of magnetization in the zero-field-cooling (ZFC) and field-cooling (FC) regime for **11** at magnetic field of 10 Oe.

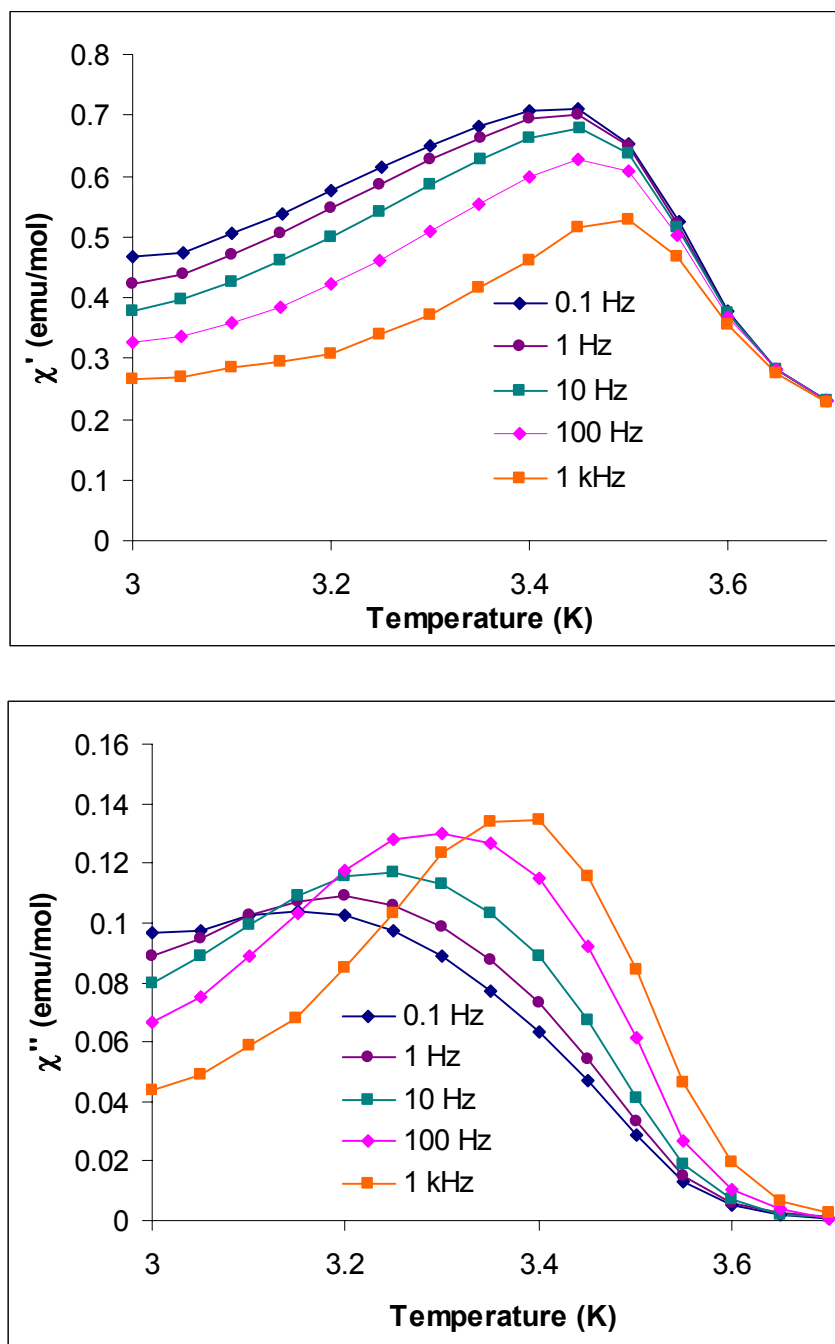

**Figure S10.** Temperature dependence of the real  $\chi'$  (top) and imaginary  $\chi''$  (bottom) components of the ac susceptibility for **3** in vicinity of the phase transition.

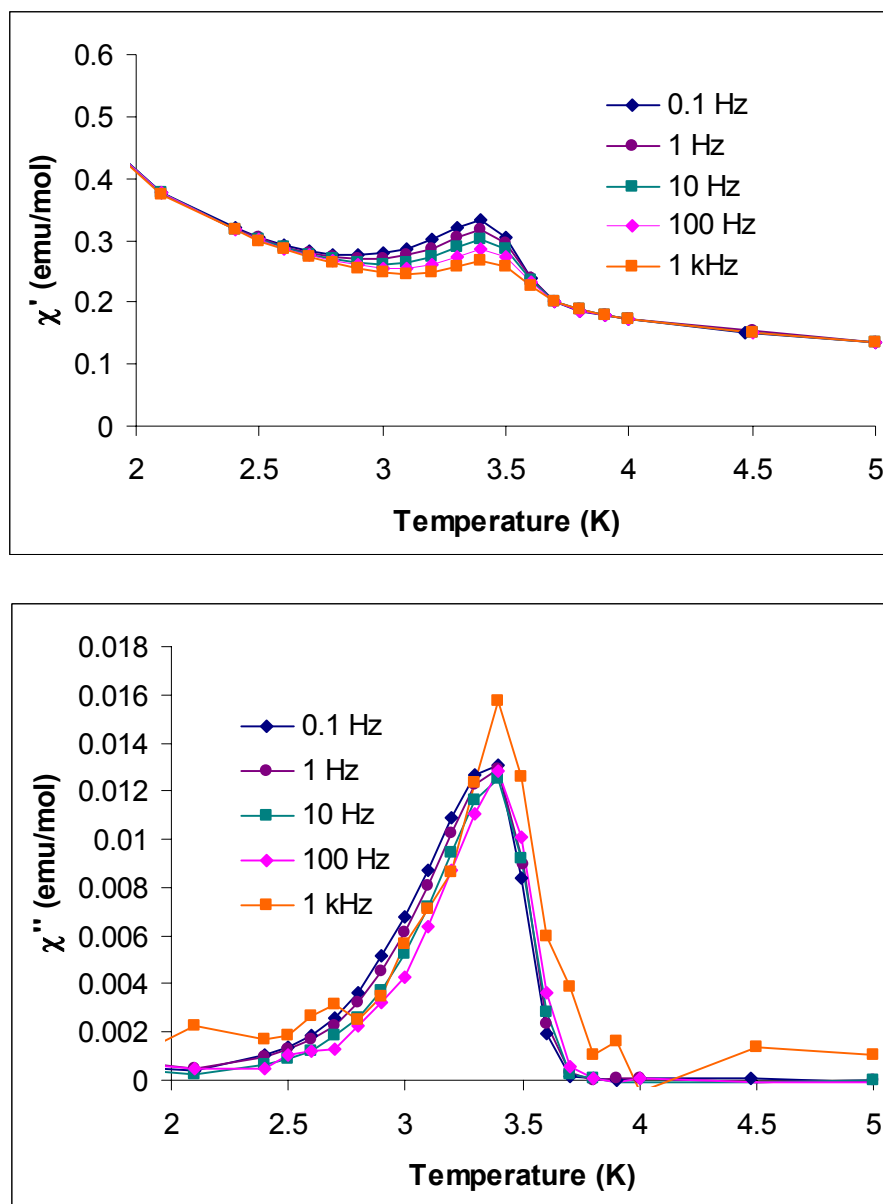

**Figure S11.** Temperature dependence of the real  $\chi'$  (top) and imaginary  $\chi''$  (bottom) components of the ac susceptibility for **9**.



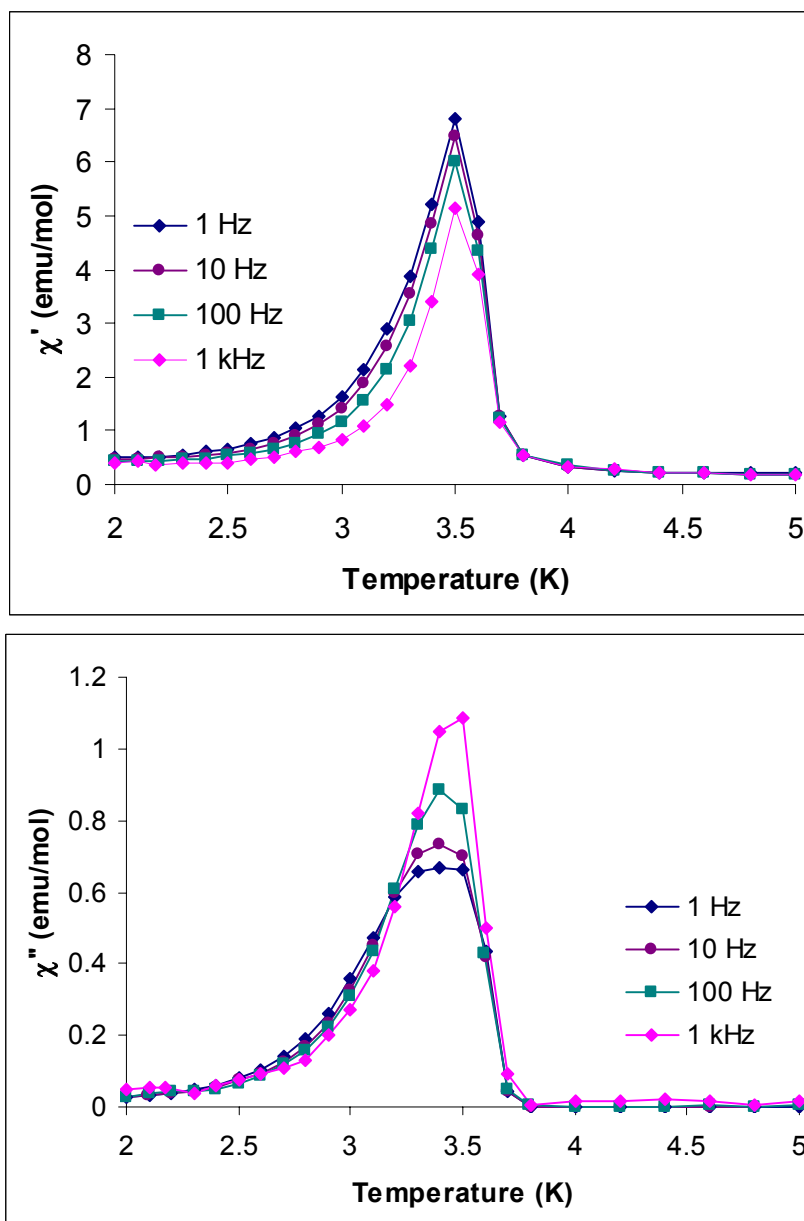

**Figure S12.** Temperature dependence of the real  $\chi'$  (top) and imaginary  $\chi''$  (bottom) components of the ac susceptibility for **10**.

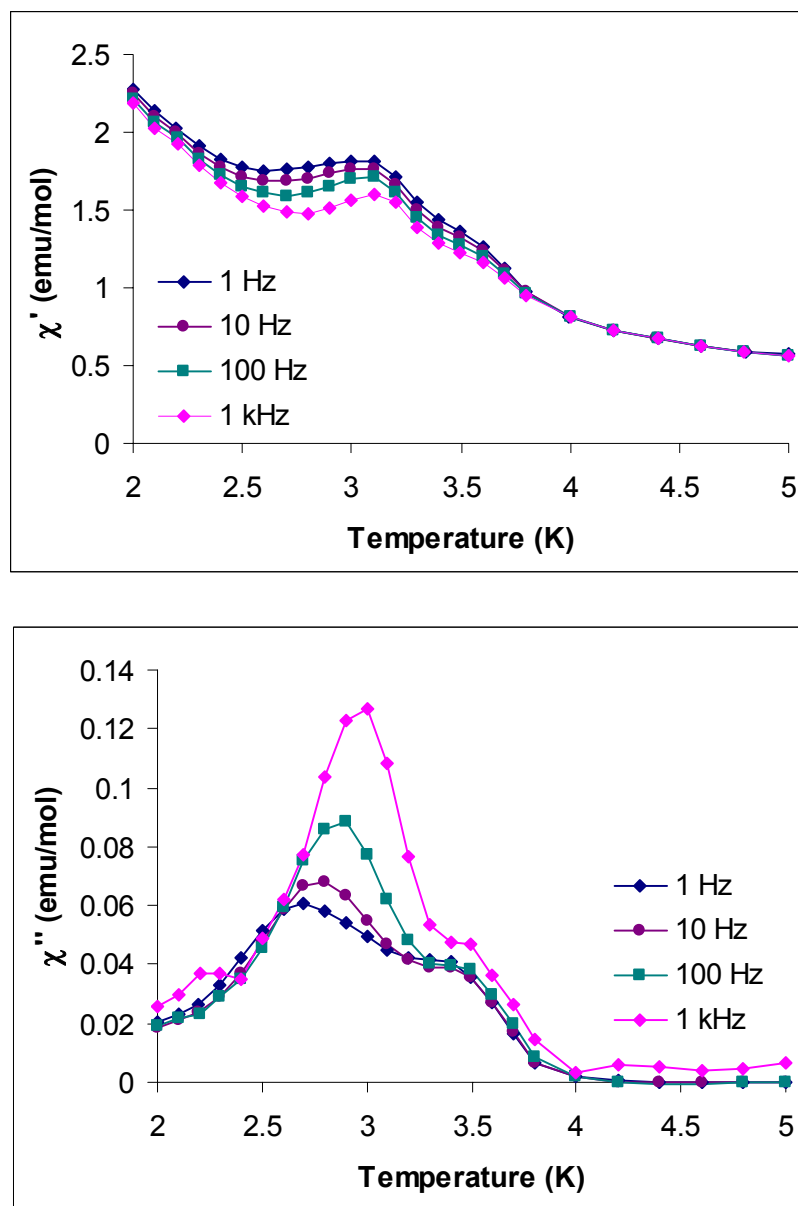

**Figure S13.** Temperature dependence of the real  $\chi'$  (top) and imaginary  $\chi''$  (bottom) components of the ac susceptibility for **11**.

**Table S1.** Selected bond lengths (Å) and angles (°) for compound **1**.

|            |            |            |          |
|------------|------------|------------|----------|
| Pr1-O(1)   | 2.492(5)   | Fe(1)-C(3) | 1.935(6) |
| Pr1-O(2)   | 2.484(5)   | Fe(1)-C(4) | 1.938(7) |
| Pr1-O(3)   | 2.512(4)   | Fe(1)-C(5) | 1.941(6) |
| Pr1-O(4)   | 2.533(5)   | Fe(1)-C(6) | 1.939(7) |
| Pr(1)-N(1) | 2.566(5)   | C(1)-N(1)  | 1.151(7) |
| Pr(1)-N(2) | 2.535(5)   | C(2)-N(2)  | 1.151(7) |
| Pr(1)-N(7) | 2.683(5)   | C(3)-N(3)  | 1.143(8) |
| Pr(1)-N(8) | 2.640(4)   | C(4)-N(4)  | 1.144(9) |
| Fe(1)-C(1) | 1.923(6)   | C(5)-N(5)  | 1.142(8) |
| Fe(1)-C(2) | 1.917(6)   | C(6)-N(6)  | 1.154(9) |
| N1-Pr1-N2  | 135.37(18) | C1-Fe1-C2  | 177.1(3) |
| N1-Pr1-N7  | 84.68(16)  | C1-Fe1-C3  | 87.6(2)  |
| N1-Pr1-N8  | 65.99(15)  | C1-Fe1-C4  | 90.3(3)  |
| N1-Pr1-N9  | 75.09(15)  | N1-C1-Fe1  | 174.8(5) |
| N2-Pr1-N7  | 139.80(17) | N2-C2-Fe1  | 176.0(5) |
| C1-N1-Pr1  | 147.1(4)   | C2-N2-Pr1  | 169.9(5) |

**Table S2.** Selected bond lengths (Å) and angles (°) for compound **3**.

|            |            |            |           |
|------------|------------|------------|-----------|
| Sm1-O(1)   | 2.453(5)   | Fe(1)-C(3) | 1.942(7)  |
| Sm1-O(2)   | 2.428(5)   | Fe(1)-C(4) | 1.945(7)  |
| Sm1-O(3)   | 2.454(5)   | Fe(1)-C(5) | 1.942(7)  |
| Sm1-O(4)   | 2.503(6)   | Fe(1)-C(6) | 1.940(8)  |
| Sm(1)-N(1) | 2.519(5)   | C(1)-N(1)  | 1.148(8)  |
| Sm(1)-N(2) | 2.501(5)   | C(2)-N(2)  | 1.142(8)  |
| Sm(1)-N(7) | 2.637(6)   | C(3)-N(3)  | 1.144(9)  |
| Sm(1)-N(8) | 2.587(5)   | C(4)-N(4)  | 1.147(9)  |
| Fe(1)-C(1) | 1.929(6)   | C(5)-N(5)  | 1.141(9)  |
| Fe(1)-C(2) | 1.921(7)   | C(6)-N(6)  | 1.157(10) |
| N1-Sm1-N2  | 135.61(19) | C1-Fe1-C2  | 177.1(3)  |
| N1-Sm1-N7  | 84.60(18)  | C1-Fe1-C3  | 87.9(2)   |
| N1-Sm1-N8  | 66.17(18)  | C1-Fe1-C4  | 90.1(3)   |
| N1-Sm1-N9  | 75.79(17)  | N1-C1-Fe1  | 173.9(5)  |
| N2-Sm1-N7  | 139.74(19) | N2-C2-Fe1  | 175.9(6)  |
| C1-N1-Sm1  | 148.1(5)   | C2-N2-Sm1  | 169.6(5)  |

**Table S3.** Selected bond lengths (Å) and angles (°) for compound **7**.

|            |            |            |          |
|------------|------------|------------|----------|
| Sm1-O(3)   | 2.461(5)   | Co(1)-C(5) | 1.889(7) |
| Sm1-O(4)   | 2.498(6)   | Co(1)-C(6) | 1.896(7) |
| Sm(1)-N(1) | 2.517(5)   | C(1)-N(1)  | 1.157(8) |
| Sm(1)-N(2) | 2.496(6)   | C(2)-N(2)  | 1.150(8) |
| Sm(1)-N(7) | 2.627(6)   | C(3)-N(3)  | 1.143(8) |
| Sm(1)-N(8) | 2.580(5)   | C(4)-N(4)  | 1.146(9) |
| Co(1)-C(1) | 1.882(6)   | C(5)-N(5)  | 1.149(9) |
| Co(1)-C(2) | 1.881(6)   | C(6)-N(6)  | 1.148(9) |
|            |            |            |          |
| N1-Sm1-N2  | 136.37(19) | C1-Co1-C2  | 176.8(3) |
| N1-Sm1-N7  | 84.04(17)  | C1-Co1-C3  | 88.1(3)  |
| N1-Sm1-N8  | 66.48(16)  | C1-Co1-C4  | 91.1(3)  |
| N1-Sm1-N9  | 76.33(16)  | N1-C1-Co1  | 174.6(5) |
| N2-Sm1-N7  | 139.56(18) | N2-C2-Co1  | 175.4(6) |
| C1-N1-Sm1  | 148.3(5)   | C2-N2-Sm1  | 170.3(5) |

**Table S4.** Selected bond lengths (Å) and angles (°) for compound **10**.

|            |            |            |           |
|------------|------------|------------|-----------|
| Sm(1)-N(1) | 2.457(5)   | Fe(1)-C(4) | 1.938(6)  |
| Sm(1)-N(2) | 2.456(5)   | Fe(2)-C(2) | 1.907(6)  |
| Sm(1)-N(7) | 2.573(4)   | C(1)-N(1)  | 1.158(7)  |
| Sm(1)-N(8) | 2.579(4)   | C(2)-N(2)  | 1.154(7)  |
| Fe(1)-C(1) | 1.906(6)   | C(3)-N(3)  | 1.159(7)  |
| Fe(1)-C(3) | 1.948(6)   | C(4)-N(4)  | 1.162(7)  |
|            |            |            |           |
| N1-Sm1-N2  | 145.04(15) | N2-C2-Fe2  | 177.6(5)  |
| N1-Sm1-O1  | 76.14(15)  | C1-Fe1-C3  | 88.3(2)   |
| N1-Sm1-O2  | 72.44(15)  | C1-Fe1-C4  | 89.7(2)   |
| C1-N1-Sm1  | 164.5(4)   | C3-Fe1-C4  | 88.9(2)   |
| C2-N2-Sm1  | 168.8(4)   | O1-Sm1-O2  | 83.77(13) |
| N1-C1-Fe1  | 176.8(5)   |            |           |

**Table S5.** Selected bond lengths (Å) and angles (°) for compound **11**.

|            |           |            |           |
|------------|-----------|------------|-----------|
| Sm(1)-N(1) | 2.525(10) | Cr(1)-C(4) | 2.069(13) |
| Sm(1)-N(2) | 2.509(10) | Cr(2)-C(2) | 2.071(12) |
| Sm(1)-N(7) | 2.555(10) | C(1)-N(1)  | 1.153(15) |
| Sm(1)-N(8) | 2.580(9)  | C(2)-N(2)  | 1.154(14) |
| Cr(1)-C(1) | 2.082(13) | C(3)-N(3)  | 1.166(18) |
| Cr(1)-C(3) | 2.051(15) | C(4)-N(4)  | 1.138(17) |
|            |           |            |           |
| N1-Sm1-N2  | 146.3(3)  | N2-C2-Cr2  | 177.0(10) |
| N1-Sm1-O1  | 75.6(3)   | C1-Cr1-C3  | 91.2(5)   |
| N1-Sm1-O2  | 79.2(3)   | C1-Cr1-C4  | 88.6(5)   |
| C1-N1-Sm1  | 164.9(9)  | C3-Cr1-C4  | 90.1(5)   |
| C2-N2-Sm1  | 163.9(8)  | O1-Sm1-O2  | 84.0(3)   |
| N1-C1-Cr1  | 175.6(10) |            |           |
